# Supplementary material
Source: PubMed Central journal article supplement (PMC7847525)
Supplement: ajtr0013-0360-f4.pdf [file ajtr0013-0360-f4.pdf]

## Radiotherapy in the treatment of HCC

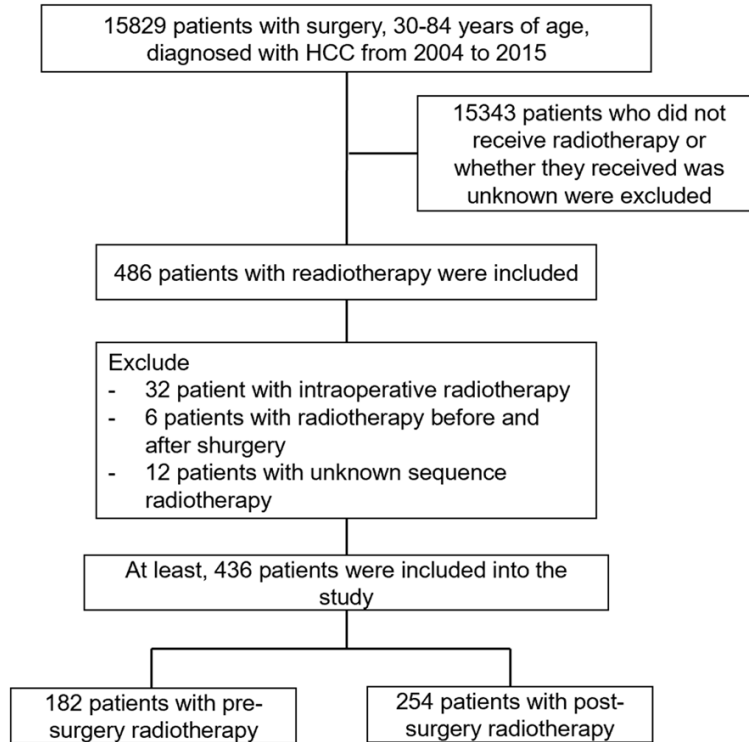

**Supplementary Figure 1.** Flowchart of patient selection.

**Supplementary Table 1.** The baseline characteristics of patients with surgery alone and surgery combined with radiotherapy

| Characteristics   | Surgery alone (n=15121, %) | Surgery combined with radiotherapy (n=436, %) | P value |
|-------------------|----------------------------|-----------------------------------------------|---------|
| Age (Years)       |                            |                                               | 0.311   |
| 30-49             | 1311 (8.7)                 | 31 (7.1)                                      |         |
| 50-69             | 10429 (69.0)               | 297 (68.1)                                    |         |
| 70-84             | 3381 (22.3)                | 108 (24.8)                                    |         |
| Gender            |                            |                                               | 0.661   |
| Male              | 11341 (75.0)               | 331 (75.9)                                    |         |
| Female            | 3780 (25.0)                | 105 (24.1)                                    |         |
| Race              |                            |                                               | <0.001  |
| White             | 10052 (66.5)               | 327 (75.0)                                    |         |
| Black             | 1684 (11.1)                | 48 (11.0)                                     |         |
| Other             | 3385 (22.4)                | 61 (14.0)                                     |         |
| Year of diagnosis |                            |                                               | <0.001  |
| 2004-2007         | 4435 (29.3)                | 89 (20.4)                                     |         |
| 2008-2011         | 4839 (32.0)                | 111 (25.5)                                    |         |
| 2012-2015         | 5847 (38.7)                | 236 (54.1)                                    |         |
| Marital status    |                            |                                               | 0.171   |
| Married           | 9003 (59.5)                | 259 (59.4)                                    |         |
| Single            | 5516 (36.5)                | 152 (34.9)                                    |         |
| Other             | 602 (4.0)                  | 25 (5.7)                                      |         |
| AJCC staging      |                            |                                               | <0.001  |
| I                 | 8240 (54.5)                | 146 (33.5)                                    |         |
| II                | 4131 (27.3)                | 117 (26.8)                                    |         |

## Radiotherapy in the treatment of HCC

|                     |              |            |        |
|---------------------|--------------|------------|--------|
| III                 | 1679 (11.1)  | 97 (22.2)  |        |
| IV                  | 271 (1.8)    | 47 (10.8)  |        |
| Unknown             | 800 (5.3)    | 29 (6.7)   |        |
| Tumor size          |              |            | <0.001 |
| ≤3 cm               | 6774 (44.8)  | 130 (29.8) |        |
| 3-5 cm              | 3967 (26.2)  | 104 (23.9) |        |
| >5 cm               | 3612 (23.9)  | 167 (38.3) |        |
| Unknown             | 768 (5.1)    | 35 (8.0)   |        |
| Tumor number        |              |            | 0.436  |
| 1                   | 12166 (80.5) | 338 (77.5) |        |
| 2                   | 2403 (15.9)  | 82 (18.8)  |        |
| 3                   | 428 (2.8)    | 13 (3.0)   |        |
| >3                  | 124 (0.8)    | 3 (0.7)    |        |
| Chemotherapy        |              |            | <0.001 |
| Yes                 | 4823 (31.9)  | 185 (42.4) |        |
| No/Unknown          | 10298 (68.1) | 251 (57.6) |        |
| Surgery             |              |            | 0.759  |
| Transplantation     | 3117 (20.6)  | 96 (22.0)  |        |
| Liver resection     | 5327 (35.2)  | 149 (34.2) |        |
| Non-liver resection | 6677 (44.2)  | 191 (43.8) |        |

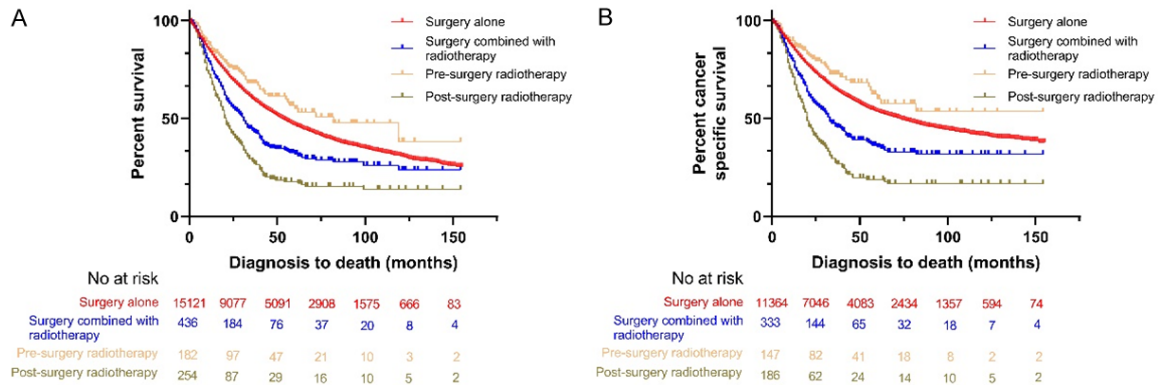

**Supplementary Figure 2.** Kaplan-Meier curve of patients with surgery alone, surgery combined with radiotherapy, pre-surgery radiotherapy, and post-surgery radiotherapy; A. Kaplan-Meier curve of OS; B. Kaplan-Meier curve of CSS.

# Radiotherapy in the treatment of HCC

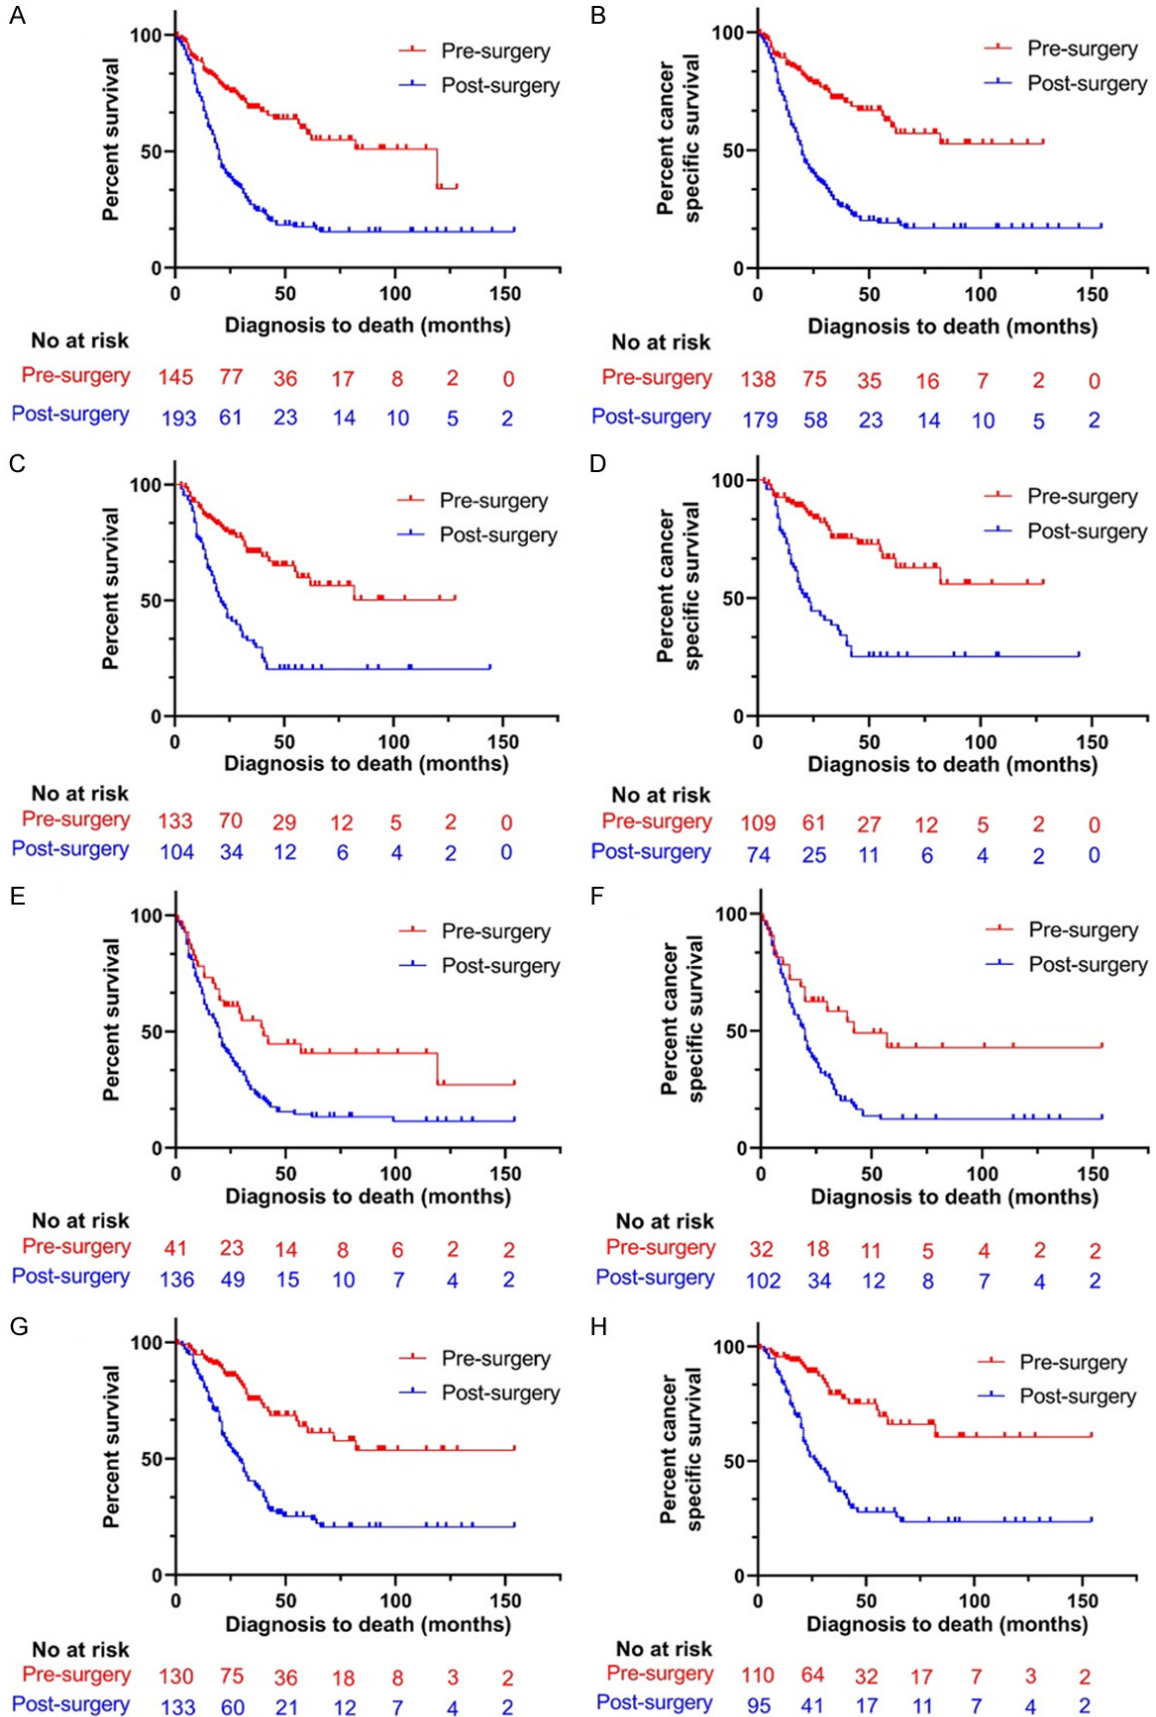

# Radiotherapy in the treatment of HCC

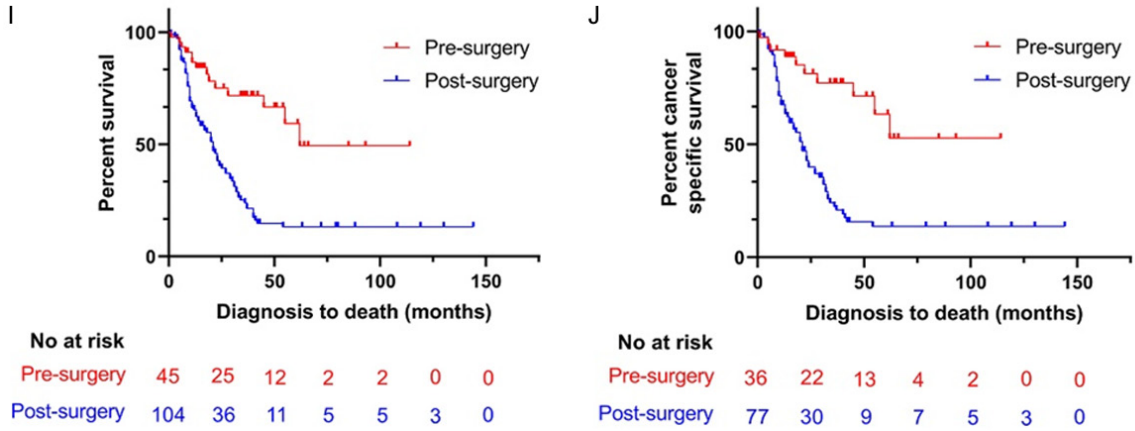

**Supplementary Figure 3.** Kaplan-Meier curve of patients in the subgroup before PSM; A, B. Kaplan-Meier curve of OS and CSS of patients with single tumor; C, D. Kaplan-Meier curve of OS and CSS of patients with internal radiotherapy; E, F. Kaplan-Meier curve of OS and CSS of patients with external radiotherapy; G, H. Kaplan-Meier curve of OS and CSS of patients with AJCC stage I and II; I, J. Kaplan-Meier curve of OS and CSS of patients with liver resection.

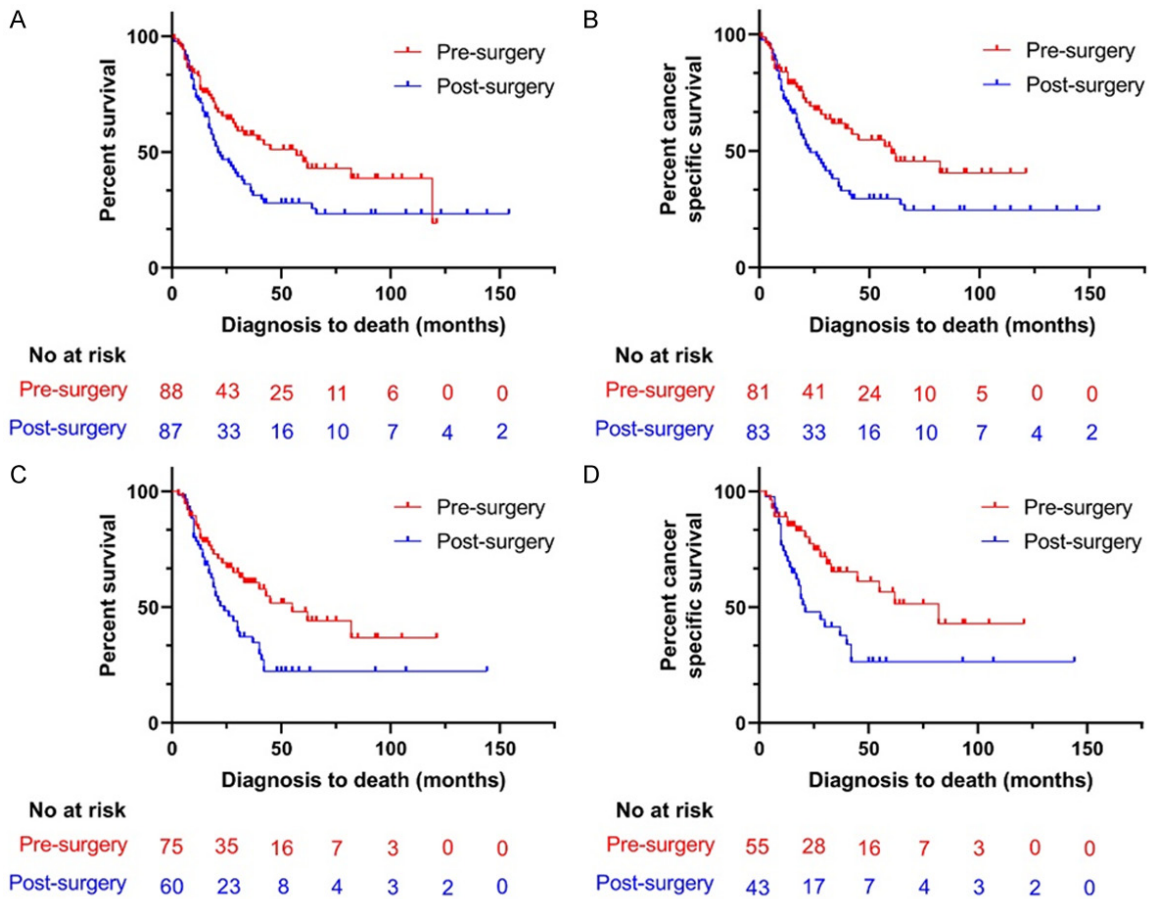

# Radiotherapy in the treatment of HCC

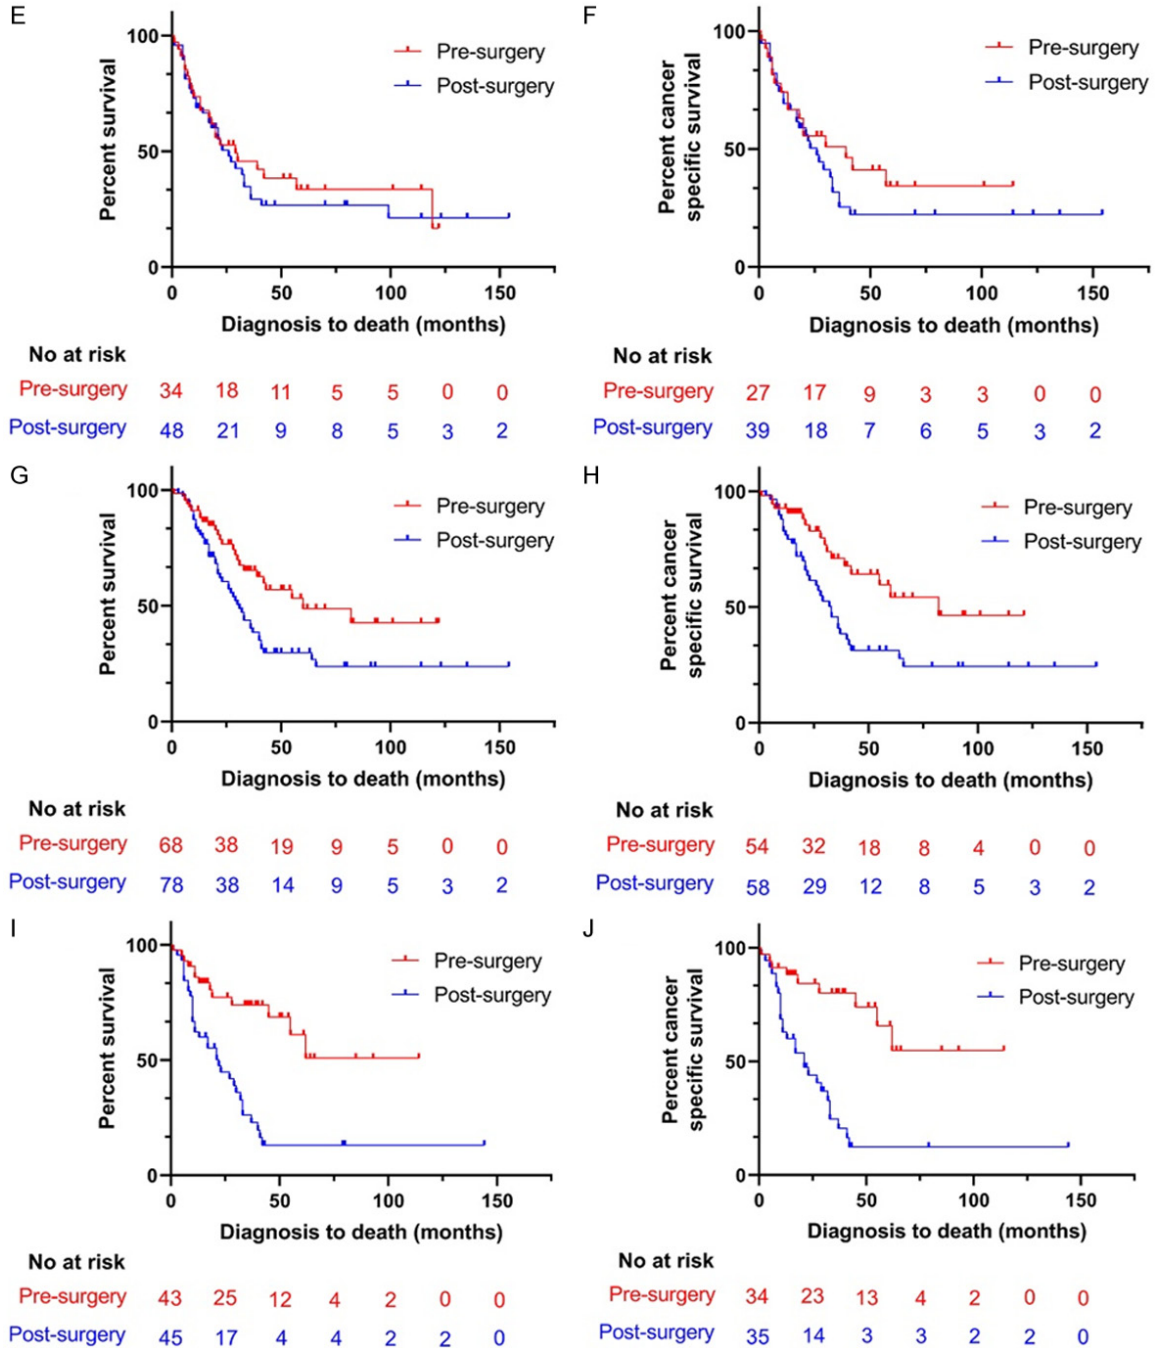

**Supplementary Figure 4.** Kaplan-Meier curve of patients in the subgroup after PSM; A, B. Kaplan-Meier curve of OS and CSS of patients with single tumor; C, D. Kaplan-Meier curve of OS and CSS of patients with internal radiotherapy; E, F. Kaplan-Meier curve of OS and CSS of patients with external radiotherapy; G, H. Kaplan-Meier curve of OS and CSS of patients with AJCC stage I and II; I, J. Kaplan-Meier curve of OS and CSS of patients with liver resection.
